# Supplementary material for: Response of hydrology and CO 2 flux to experimentally altered rainfall frequency in a temperate poor fen, southern Ontario, Canada
Source: Copernicus journal article supplement (doi:10.5194/bg-15-3937-2018), 2018-07-02
Supplement: Supplementary file 1 [file bg-15-3937-2018-supplement.pdf]

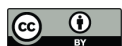

*Supplement of*

**Response of hydrology and CO<sub>2</sub> flux to experimentally altered rainfall frequency in a temperate poor fen, southern Ontario, Canada**

**Danielle D. Radu and Tim P. Duval**

*Correspondence to:* Tim P. Duval ([tim.duval@utoronto.ca](mailto:tim.duval@utoronto.ca))

The copyright of individual parts of the supplement might differ from the CC BY 4.0 License.

**Table S1:** Mean values of set-point diurnal meteorological conditions in growth chamber and the study site (May-September 2015).

| Location | Diurnal Phase | Air temperature (°C) | Relative Humidity (%) | Vapour Pressure Deficit | PAR ( $\mu\text{mol m}^{-2}\text{s}^{-1}$ ) | Number of hours in each diurnal phase |
|----------|---------------|----------------------|-----------------------|-------------------------|---------------------------------------------|---------------------------------------|
| Chamber  | Day           | 19.2                 | 69                    | 0.69                    | 300                                         | 15                                    |
|          | Night         | 12.1                 | 90                    | 0.14                    | 0                                           | 9                                     |
| <hr/>    |               |                      |                       |                         |                                             |                                       |
| Field    | Day           | 19.1                 | 69.7                  | 0.67                    | 635                                         | 15                                    |
|          | Night         | 12.1                 | 93.8                  | 0.09                    | 0                                           | 9                                     |

**Table S2:** Precipitation characteristics of treatments in the growth chamber and the study site (May-September 2015).

| Location | Treatment   | Frequency          | # of dry days between events | Amount per event (mm) | % of days with rain |
|----------|-------------|--------------------|------------------------------|-----------------------|---------------------|
| Chamber  | HiFreq-Lab  | 3x/ week           | 1-2                          | 2.3                   | 42                  |
|          | MedFreq-Lab | 1x/ week           | 6                            | 6.9                   | 14                  |
|          | LowFreq-Lab | 0.5x/ week         | 13                           | 13.8                  | 7                   |
| <hr/>    |             |                    |                              |                       |                     |
| Field    | Ambient     | 3( $\pm$ 2)x/ week | 2( $\pm$ 2)                  | 6 ( $\pm$ 9)          | 38                  |
|          | HiFreq      | 3x/ week           | 1( $\pm$ 1)                  | 5 ( $\pm$ 2)          | 42                  |
|          | MedFreq     | 1x/ week           | 6( $\pm$ 1)                  | 13( $\pm$ 6)          | 14                  |
|          | LowFreq     | 0.5x/ week         | 13( $\pm$ 1)                 | 29( $\pm$ 8)          | 7                   |

**Table S3:** Mean (standard deviation) values of hydrological variables for each precipitation treatment within each vegetation community during the field experiment (May-September 2015). Different letters indicate significant differences ( $p < 0.05$ ) between precipitation treatments within each water table and vegetation treatment. No letters indicate no significant differences.

| Vegetation Community | Rainfall Treatment | VMC (%) | WT (cm)  |
|----------------------|--------------------|---------|----------|
| Moss                 | HiFreq             | 75(6)a  | -17(6)a  |
|                      | MedFreq            | 75(7)a  | -12(6)b  |
|                      | LowFreq            | 71(8)b  | -13(6)ab |
| -----                |                    |         |          |
| Shrub                | HiFreq             | 50(3)a  | -18(6)   |
|                      | MedFreq            | 26(3)b  | -18(6)   |
|                      | LowFreq            | 30(4)c  | -16(6)   |
| -----                |                    |         |          |
| Sedge                | HiFreq             | 27(2)a  | -21(6)a  |
|                      | MedFreq            | 82(6)b  | -11(6)b  |
|                      | LowFreq            | 68(11)c | -13(6)b  |

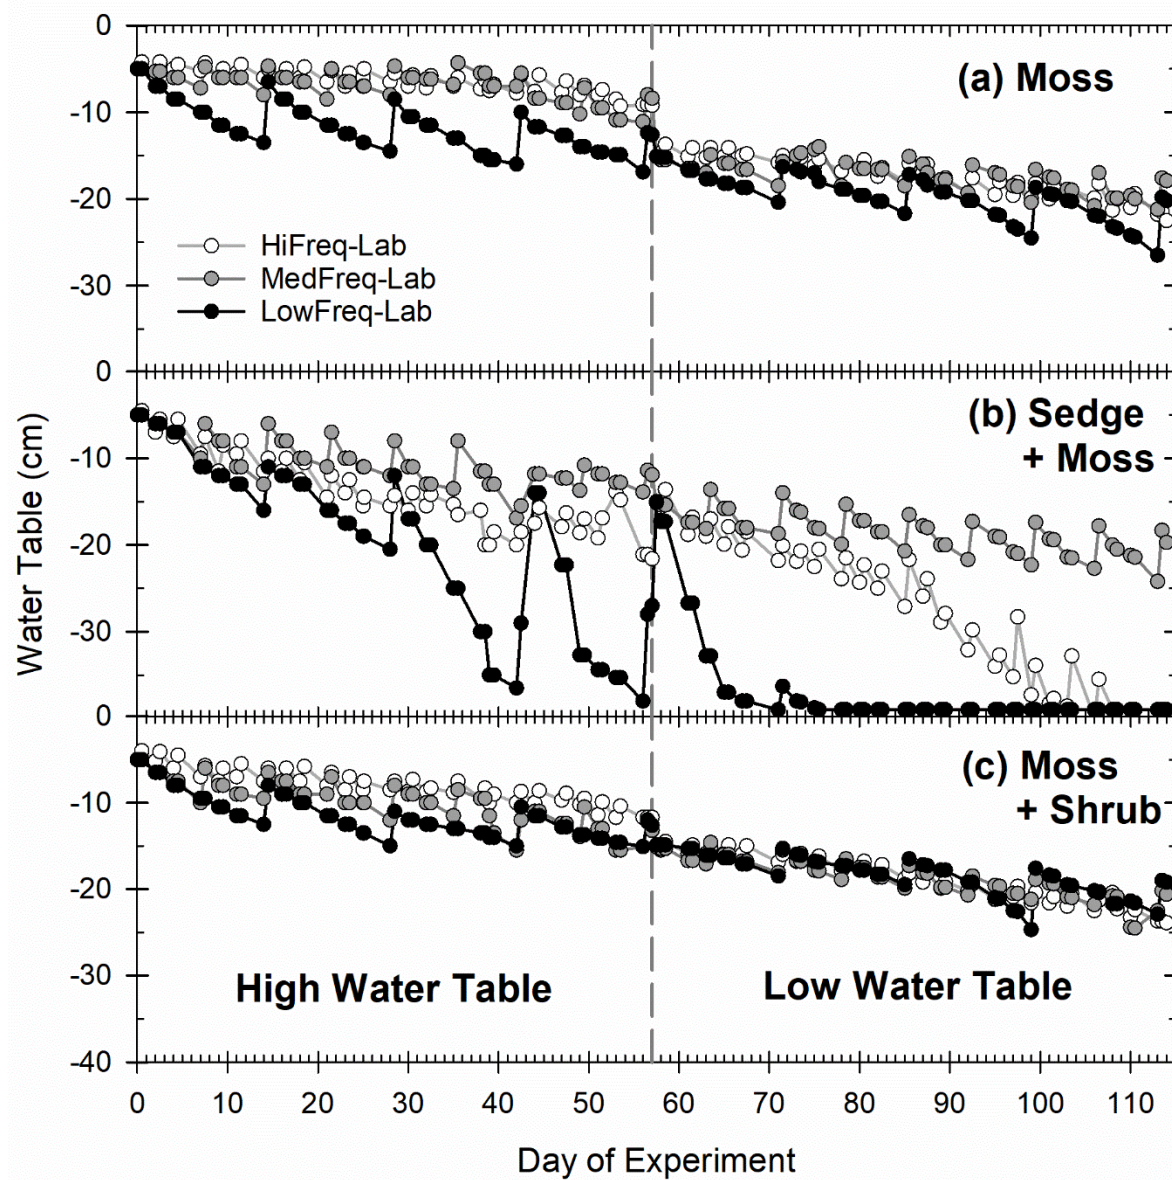

**Figure S1: Water table fluctuation between rainfall frequency treatments in (a) Moss, (b) Sedge + Moss, and (c) Moss + Shrub monoliths.**



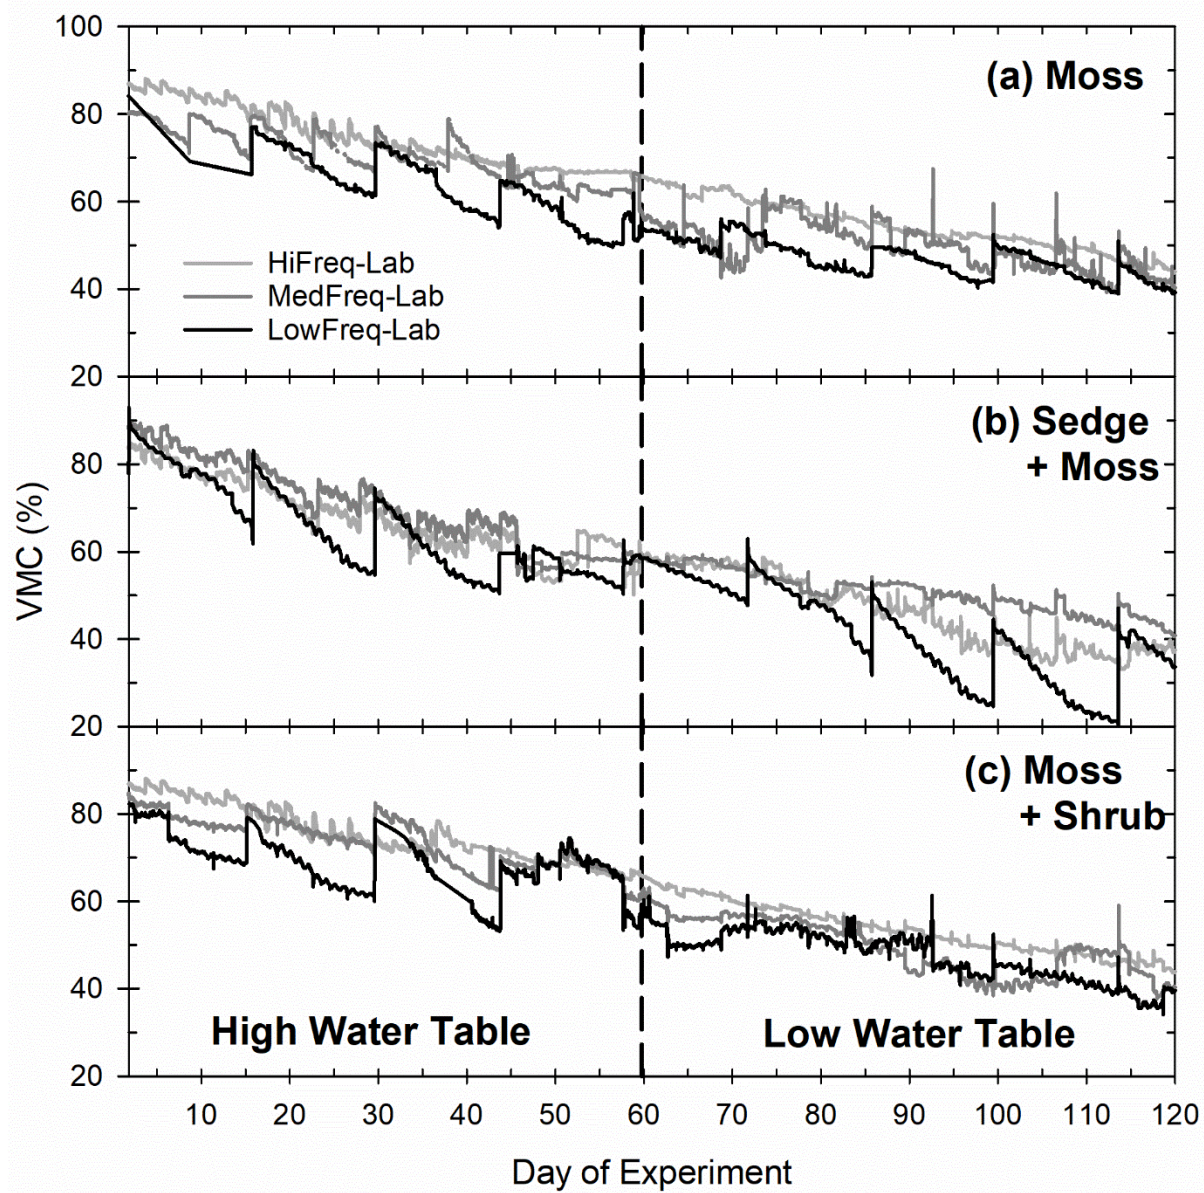

**Figure S2: Near-surface volumetric moisture content fluctuation between rainfall frequency treatments in (a) Moss, (b) Sedge + Moss, and (c) Moss + Shrub monoliths.**

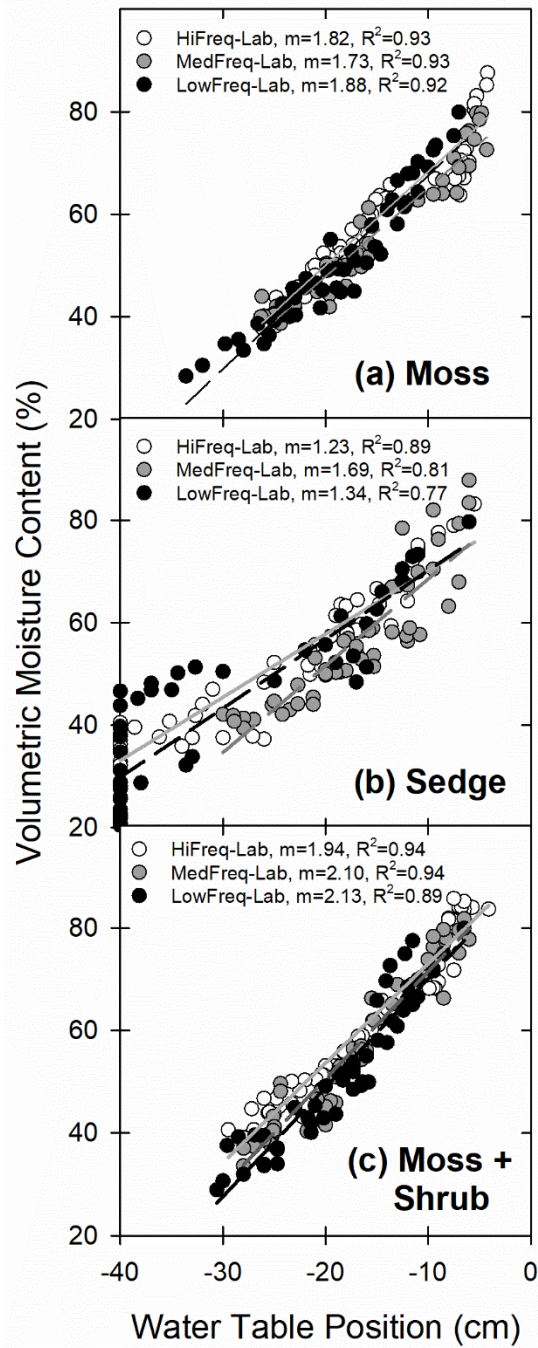

**Figure S3: Relationship between daily average VMC and WT depth for (a) Moss, (b) Sedge + Moss, and (c) Moss + Shrub communities. Slopes and correlation coefficients ( $R^2$ ) of the regressions for each precipitation treatment are shown. All correlations were significant ( $p < 0.001$ ).**

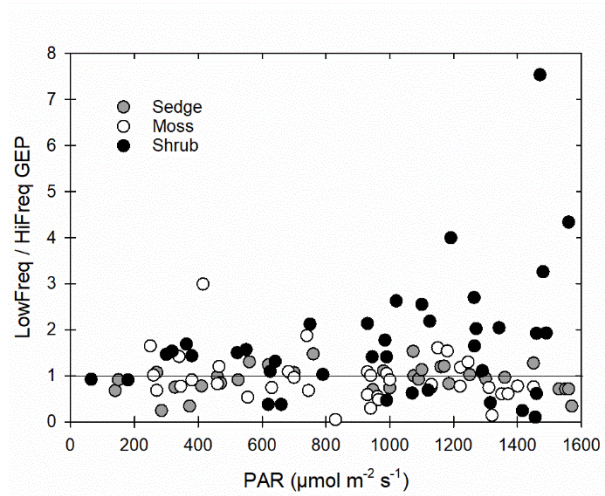

**Figure S4: Ratios of GEP of plots receiving the low-frequency treatment to plots receiving the high-frequency treatment at the same PAR values. Different symbols indicate measurements taken in the Moss, Sedge, and Shrub vegetation communities at the field site during May-September 2015. The horizontal line indicates equal GEP between frequency treatments at the given PAR value.**



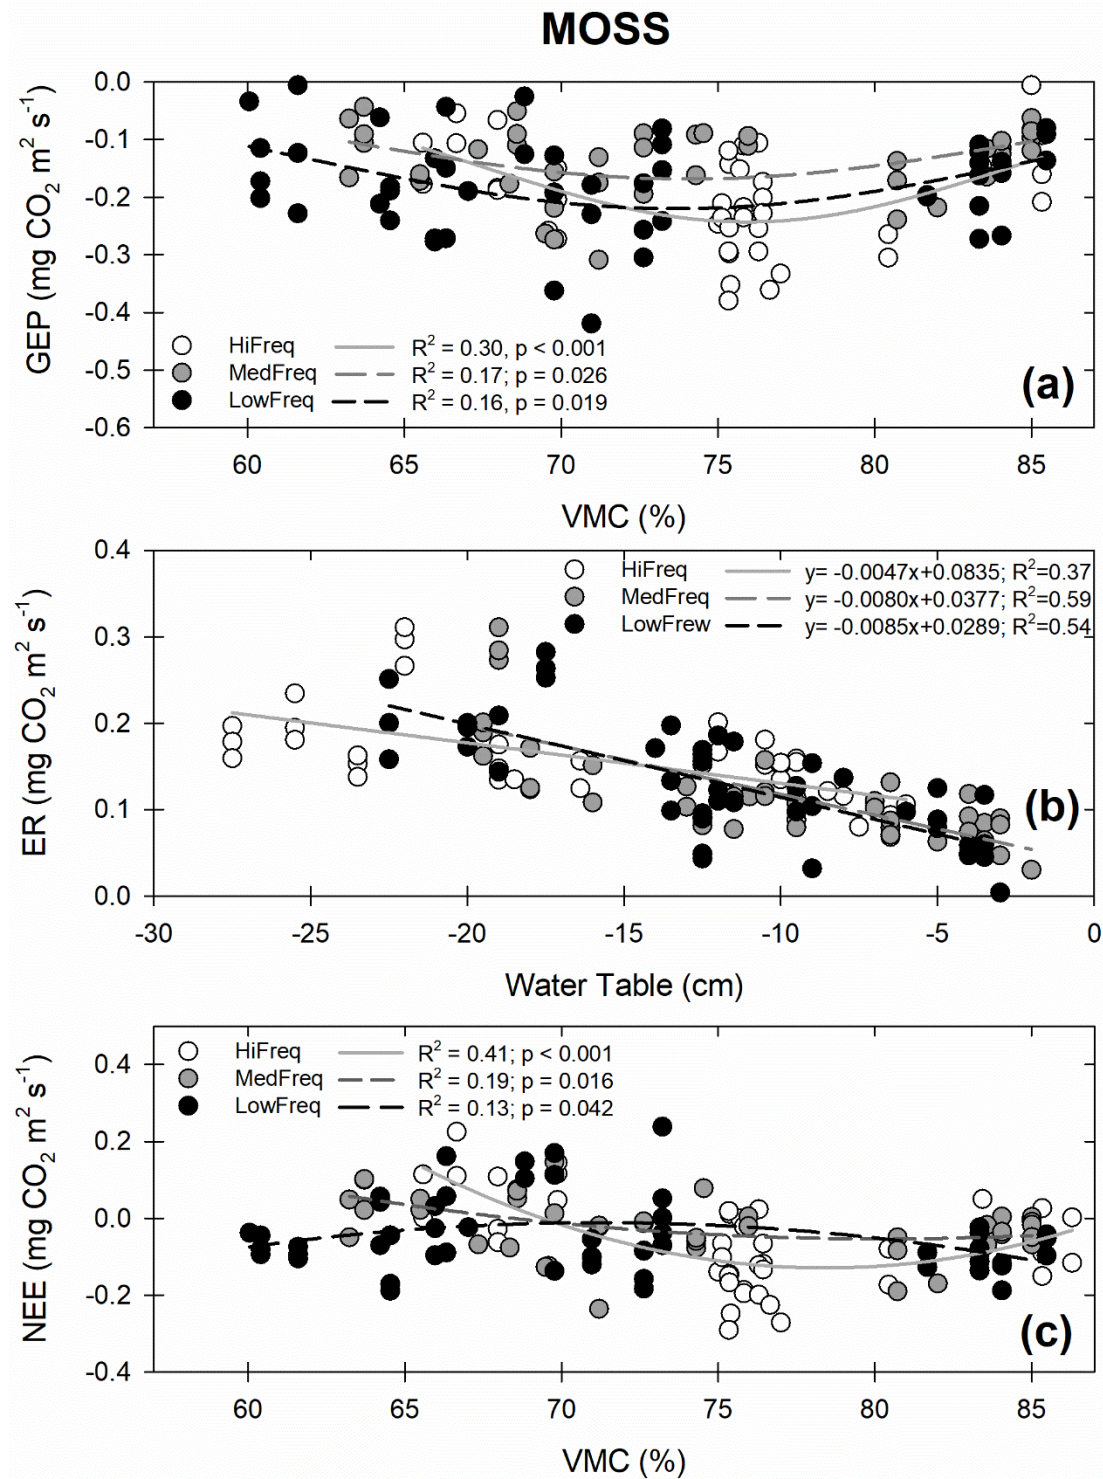

**Figure S5: Hydrologic controls on CO<sub>2</sub> exchange in *S. capillifolium*-dominated field plots, depicting relationships in (a) GEP, (b) ER, and (c) NEE between rainfall frequency treatments. Relationships in (a) and (c) are unimodal with indicated correlation coefficients and significance. Relationships in (b) are linear and are indicated with correlation coefficients. All regressions in (b) were significant at  $p < 0.001$ .**
